# Supplementary material for: Policy Design for Cash-for-Repair Housing Recovery under High Inflation: Supervision Intensity, Safety Outcomes, and Equity Trade-offs
Source: Research Square preprint supplement (doi:10.21203/rs.3.rs-8862024/v1), 2026-02-19
Supplement: Supplementary file 1 [file 050b1a8bddb7b01e74aa9f54.docx]

**Supplementary Material**

Title: Policy Design for Cash-for-Repair Housing Recovery under High Inflation: Supervision Intensity, Safety Outcomes, and Equity Trade-offs.

**Appendix**

**Appendix A. Technical specification of the simulation model**

**A.1. Purpose and scope**

The simulation model is designed as a policy-exploration tool, not as a full structural engineering model. Its aim is to:

Represent, in a stylised and transparent way, how grant size, engineering supervision and.

Implementation modality jointly affect: (i) the number of households reached under a fixed budget, (ii) the structural quality of repaired houses, and (iii) beneficiary satisfaction.

Explore the coverage–quality–satisfaction trade-offs under high inflation, under three stylised.

policy scenarios (A–C) reported in Section 4.4. The model works with a synthetic population of damaged houses and produces summary statistics at scenario level; it is explicitly intended to be illustrative and transparent, rather than a precise predictive model.

**A.2. Synthetic population and cost distribution**

We consider a notional population of N = 10,000 damaged houses, indexed by i = 1,…,N. For each house, the true pre-inflation repair cost C_i (in USD) is drawn from a truncated normal distribution: C_i ∼ TruncatedNormal(μ = 5,000, σ = 2,000, lower = 2,000, upper = 10,000). This choice reflects the field impression that most conflict-related repairs in Taiz lie in the 2,000–10,000 USD range, with a central tendency around 5,000 USD, but with substantial dispersion. To account for inflation, the model applies an inflation factor π to all repair costs: C_i^(π) = π · C_i, where in the main simulation we use π = 2.0 (100% cost increase relative to the baseline).

**A.3. Policy scenarios and parameters**

We simulate three stylised policy scenarios, each characterised by: a grant per household (G^(s)), a supervision intensity parameter (S^(s)), and a beneficiary control parameter (B^(s)), where s ∈ {A, B, C} indexes the scenario. The values used in the reported results are: Scenario Description Grant (G^(s)) Supervision (S^(s))* Control (B^(s))* A Low grant / weak supervision / ODR 2,000 USD 0.2 1.0 B Medium grant / strong supervision / hybrid 4,000 USD 0.6 0.6 C High grant / very strong supervision / contractor 8,000 USD 0.9 0.2

* S^(s) and B^(s) are normalised between 0 and 1 and are not observed data, but modelling parameters that capture the relative intensity of supervision and the degree of beneficiary control in each scenario.

**A.4. Coverage under a fixed budget**

We assume a fixed total budget B_total = 1,000,000 USD. Given a grant G^(s), the maximum number of households that can be assisted under scenario s is: N_covered^(s) = ⌊ B_total / G^(s) ⌋. For the three scenarios:

Scenario A: N_covered^(A) = 500.; Scenario B: N_covered^(B) = 250.; Scenario C: N_covered^(C) = 125.

matching the “Households Covered” column in Table 8. For each scenario s, we randomly select N_covered^(s) households from the synthetic population without replacement.

**A.5. Financial coverage ratio**

For each covered house i in scenario s, we define a financial coverage ratio that compares the grant to the effective post-inflation cost: R_i^(s) = min( G^(s) / C_i^(π), 1 ) so that:

R_i^(s) = 1 means the grant is sufficient to fully cover the (inflated) repair cost.; R_i^(s) < 1 indicates partial coverage, with households forced to either (a) “patch” rather.

than fully repair, or (b) mobilise additional private resources.

**A.6. Structural quality function**

The structural quality score Q_i^(s) for each covered house i in scenario s is conceptualised as a function of: (i) the coverage ratio R_i^(s), (ii) the supervision level S^(s), (iii) an approachspecific adjustment capturing residual effects of the modality, and (iv) a small random term. We use a bounded linear specification on a 0–100 scale: Q_i^(s) = max(0, min(100, 100 · [ α_0 + α_R R_i^(s) + α_S S^(s) + α_M M^(s) + ε_i ] ) ). where:

α_0 is a baseline intercept.; α_R captures the effect of financial coverage.; α_S captures the contribution of supervision.; M^(s) is a scenario adjustment.; ε_i is a mean-zero noise term (e.g. ε_i ∼ N(0, σ_ε)).

In the implementation used for the reported results, parameters were chosen by iterative calibration so that under π = 2.0:

Scenario A: mean quality well below safety threshold, 0% safe.; Scenario B: ~48–50% safe.; Scenario C: ~98% safe.

The safety threshold used in Section 4.4 is: Safe_i^(s) = 1( Q_i^(s) ≥ 70 ).

**A.7. Satisfaction function**

Beneficiary satisfaction is assumed to depend on perceived structural quality and perceived control (agency). We use a 1–5 scale: S_i^(s) = max(1, min(5, β_0 + β_Q · (Q_i^(s) / 20) + β_B · B^(s) + η_i ) ). where:

Q_i^(s) / 20 maps structural quality (0–100) to a 0–5 range.

β_Q scales the importance of technical performance.; β_B scales the importance of agency/control.; η_i is a mean-zero noise term.

**A.8. Simulation workflow**

The full simulation for a given inflation factor π proceeds as follows: 1. Generate synthetic population: Draw C_i and compute C_i^(π). 2. Loop over scenarios (s): 3. Compute N_covered^(s). 4. Randomly select households. 5. For each household, compute coverage ratio R_i^(s), structural quality Q_i^(s), and satisfaction S_i^(s). 6. Aggregate: Compute means and % Safe (>70). 7. Export: Generate results for Table 8 and Figure 2.

**A.9. Simulation parameter values (heuristically calibrated)**

The simulation results presented in Section 4.4 were generated using the functional forms specified in A.6 and A.7, combined with a set of heuristically calibrated parameter values consistent with the empirical findings and expert narratives derived from the qualitative strand. These parameters represent a stylized scenario intended to demonstrate clear policy trade-offs rather than precise predictive forecasting. A full formal sensitivity analysis lies beyond the scope of this study. Table A.1 details the core coefficients and parameters used in the primary simulation run under the high inflation scenario (π = 2.0). The relative weight placed on supervision (α_S = 0.50) is qualitatively derived from the expert consensus obtained in the interview strand, where stakeholders consistently identified the engineer as the decisive “quality gatekeeper” without whom financial inputs are ineffective. This justification grounds the parameter value in the specific empirical context of Taiz, although future work should seek to further calibrate these weights using technical audit data. Simple sensitivity checks (varying S^(s) and π within plausible ranges) indicate that the qualitative ranking of scenarios A–C is preserved, suggesting that the main coverage–safety trade-off is not an artefact of a single parameter choice. Table A.1. Key Parameters Used in the Scenario-Based Simulation Model Parameter Function / Context Value Description General Parameters μ Cost Distribution 5,000 USD Mean pre-inflation repair cost. σ Cost Distribution 2,000 USD Standard deviation of pre-inflation repair cost. π Inflation 2.0 Inflation factor used in the main scenario (100% cost increase). Structural Quality Function (Q_i^(s)) α_0 Intercept 0.20 Baseline quality intercept (on a normalized 0–1 scale). α_R Financial Coverage 0.40 Weight of the

(R_i^(s)) financial coverage ratio. α_S Supervision (S^(s)) 0.50 Weight of supervision intensity (identifying supervision as the critical lever). α_M Modality Adjustment 0.10 Coefficient for modality-specific effects (M^(B)=+1 for Hybrid; M^(C)=1 for Contractor). σ_ε Noise Term (ε_i) 0.05 Standard deviation of the random error term for quality. Satisfaction Function (S_i^(s)) β_0 Intercept 2.0 Baseline satisfaction intercept (on a 1–5 scale). β_Q Structural Quality 0.50 Weight of perceived structural quality (Q_i^(s)/20). β_B Agency/Control (B^(s)) 1.0 Weight of beneficiary agency (reflecting the high value placed on autonomy). σ_η Noise Term (η_i) 0.30 Standard deviation of the random error term for satisfaction.

**Appendix B. Interview Guide – Semi-Structured Interviews**

دليل المقابلة– )مقابالت شبه مُ نظَّ مة (ثنائ ي اللغة

Study Title: Shelter Rehabilitation Strategies in Yemen Method: Semi-structured interviews Participants: National cluster leads, sub-national coordinators, engineers, NGO project managers, local authorities, and community leaders Version: 1.0 Date: __________

Opening Script نص الفتتاح

Thank you for your time. The purpose of this interview is to understand your professional experience with shelter programmes and housing rehabilitation in Yemen. Your identity will remain strictly confidential. We will use a participant code (P01–P20) instead of names. With your permission, I would like to audio-record this interview to ensure accuracy of the transcript. Participation is voluntary, and you may decline to answer any question or stop the interview at any time. Do you consent to audio recording?

نشكرك على وقتك. هدف هذه المقابلة هو فهم خبراتك العملية في مشاريع المأوى وترميم المنازل في اليمن. ستظل هويتك سرية تمامًا، وسيتم استخدام نظام ترميز (P01– P20) بدالً من األسماء. وبموافقتك، أرغب في تسجيل المقابلة صوتيًا لضمان دقة التفريغ النصي. المشاركة طوعية، ويمكنك االمتناع عن اإلجابة على أي سؤال أو إنهاء المقابلة في أي وقت. هل توافق على التسجيل الصوتي للمقابلة؟

SECTION 1 — Participant Background and Experience القسم1

—

الخلفية وخبرة المشارك

English

العربية

1. What is your current role and main responsibilities?

1. ما هو دورك الحالي وما هي مسؤولياتك الرئيسية؟

2. How many years of experience do you have in shelter, engineering, or humanitarian programming?

2. كم سنة من الخبرة لديك في قطاع المأوى أو الهندسة أو البرامج اإلنسانية؟

3. What is the scope of your work (geographic coverage and key functions)?

3. ما هو نطاق عملك )جغرافيًا ومهاميًا(؟

SECTION 2 — Shelter Delivery Strategies القسم2

— االستراتيجيات المتبعة في المأوى

English

العربية

4. What types of shelter interventions are you currently implementing (rehabilitation, cash assistance, emergency support, etc.)?

4. ،ما أنواع تدخالت المأوى التي تنفذونها حاليًا )ترميم نقد، طوارئ… إلخ(؟

5. How do you decide which shelter modality is most appropriate for a given case or household?

5. كيف يتم اختيار االستراتيجية/النهج األنسب لكل حالة أو أسرة؟

6. Do delivery strategies vary by geographic context (e.g., Taiz, Marib, Al Hudaydah, etc.)? If so, how?

6. هل تختلف االستراتيجيات حسب السياق الجغرافي )تعز، مأرب، الحديدة… إلخ(؟ وإذا نعم، كيف؟

7. In your view, what are the main advantages and disadvantages of ownerdriven rehabilitation compared to contractorled approaches?

7. »ما رأيك في مزايا وعيوب نهج «الترميم بقيادة المالك مقارنة بنهج «التنفيذ عبر المقاول»؟

SECTION 3 — Technical Standards and Construction Quality القسم3

— الجودة والمعايير الفنية

English

العربية

8. What technical or engineering standards and guidance do you rely on for shelter rehabilitation?

8. ما المعايير الفنية أو الهندسية واإلرشادات التي تعتمدون عليها في ترميم المساكن؟

9. What are the most common quality challenges encountered during housing rehabilitation?

9. ما أبرز تحديات الجودة التي تواجهونها أثناء ترميم المنازل؟

10. Is engineering supervision adequate? How is supervision organised and implemented in practice?

10. هل يوجد إشراف هندسي كافٍ؟ وكيف يتم تنظيم وتنفيذ اإلشراف عمليًا؟

SECTION 4 — Effectiveness, Sustainability, and Beneficiary Satisfaction القسم4

—

الفعالية واالستدامة ورضا المستفيدين

English

العربية

11. How effective do you consider current rehabilitation approaches in achieving programme objectives?

11. ما مدى فعالية استراتيجيات الترميم الحالية في تحقيق أهداف البرامج؟

12. What factors are most important to

12. ما العوامل األهم لضمان استدامة ومتانة أعمال

ensure the sustainability and durability of rehabilitation works? الترميم؟

13. How do you measure or assess beneficiary satisfaction in your programmes?

13. كيف تقيسون أو تقيّمون رضا المستفيدين في برامجكم؟

14. What factors most strongly influence homeowners’ satisfaction with shelter assistance?

14. ما العوامل التي تؤثر بشكل أكبر على رضا أصحاب المنازل عن المساعدة المقدّمة؟

SECTION 5 — Key Challenges and Enablers القسم5

—

التحديات والعوامل الممكنة

English

العربية

15. What are the main operational, administrative, and financial challenges affecting shelter projects?

15. ما أبرز التحديات التشغيلية أو اإلدارية أو المالية التي تؤثر على مشاريع المأوى؟

16. What enabling factors (enablers) most contribute to successful project delivery and quality outcomes?

16. ما العوامل الممكنة التي تساعد أكثر على نجاح تنفيذ المشاريع وتحسين الجودة؟

SECTION 6 — Coordination and Stakeholder Engagement القسم6

—

التنسيق وإشراك أصحاب المصلحة

English

العربية

17. How is coordination conducted with the Shelter Cluster, implementing partners, and local authorities?

17. كيف يتم التنسيق مع الكتلة/التجمع (Shelter Cluster) والشركاء المنفذين والسلطات المحلية؟

18. How is the local community engaged (e.g., community committees and local leaders)?

18. كيف تتم مشاركة المجتمع المحلي )مثل لجان المجتمع والعُقّال/القيادات المحلية(؟

SECTION 7 — Lessons Learned and Recommendations القسم7

—

الدروس المستفادة والتوصيات

English

العربية

19. Based on your experience, what are the most important lessons learned from shelter rehabilitation in Yemen?

19. من واقع خبرتك، ما أهم الدروس المستفادة من ترميم المأوى في اليمن؟

20. What recommendations would you propose to improve the quality and effectiveness of shelter rehabilitation programmes? 20. ما التوصيات التي تقترحها لتحسين جودة وفعالية مشاريع ترميم المأوى؟ Closing Script نص الختام

Thank you for your participation. The information you shared will be used for academic research purposes only and your identity will remain confidential. If you would like to receive a summary of the findings, we can share it with you at a later stage.

شكرًا لمشاركتك. سيتم استخدام هذه المعلومات ألغراض البحث األكاديمي فقط، وستظل هويتك سرية. إذا رغبت في استالم ملخص للنتائج، يسعدنا مشاركته معك في مرحلة الحقة.

**Appendix C. COREQ Checklist**

COREQ Checklist (32-Item Consolidated Criteria for Reporting Qualitative Research)

Domain 1: Research team and reflexivity

Item

Description

Response

1

Interviewer/facilitator

الباحث األساسي (Author 1)

2

Credentials

MA/PhD Researcher

3

Occupation

باحث في مجال المأوى/العمل اإلنساني

4

Gender

(أنثى/ذكر )يُحدد حسب الورقة

5

Experience

خبرة12 سنوات في السياق اليمني+

6

Relationship established

ال يوجد عالقة مسبقة مع أغلب المشاركين

7

Participant knowledge of interviewer

تم توضيح هدف الدراسة ودور الباحث

8

Researcher characteristics

تمت كتابة مذكرة تأمل ذاتي (Reflexivity)

Domain 2: Study design

Item

Description

Response

9

Methodological orientation

Thematic Analysis (Braun & Clarke, 2006)

10

Sampling

Purposive sampling

11

Sample size

20 participants

12

Approach

Face-to-face + phone interviews

13

Non-participation

ال يوجد انسحابات

14

Interview guide

نعم، تم استخدام دليل شبه مهيكل

15

Recording

تسجيل صوتي بعد الموافقة الشفهية

16 Field notes نعم

17

Duration

35–75 دقيقة

18

Data saturation

تحقق بعد المقابلة رقم17

19

Transcripts returned

(ال )غير مناسب في السياق اليمني

Domain 3: Analysis and findings

Item

Description

Response

20

Number of coders

مراجعة من زميل+ باحث واحد (Peer Review)

21

Coding framework

Inductive coding + Codebook

22

Software

تحليل يدوي/Excel

23

Participant checking

غير ممكن ألسباب أمنية وسياقية

24

Quotations presented

نعم، مع رمز المشاركة (P01–P20)

25

Data consistency

نعم– تتطابق االقتباسات مع الثيمات

26

Clarity of major themes

نعم

27

Minor themes

نعم

**Appendix D. Audit Trail**

Methodological Protocol (Audit Trail): Semi-Structured Interviews and Thematic Analysis 1. Study Design This study adopted a qualitative research design using semi-structured interviews and thematic analysis (Braun & Clarke, 2006). The qualitative component was designed to elicit in-depth stakeholder experiences, implementation challenges, and perceptions regarding shelter rehabilitation strategies in Yemen, with a primary focus on Taiz and comparative insights from other operational contexts. Semi-structured interviewing was selected to enable systematic coverage of key domains while allowing participants to elaborate on practices, decision processes, and contextual constraints typical of complex humanitarian settings. 2. Development of the Interview Guide The interview guide was developed through an iterative process comprising the following steps: A focused review of literature on shelter rehabilitation in fragile and conflict-affected settings, humanitarian shelter programming, owner-driven reconstruction modalities, construction quality and engineering supervision, and Yemen-specific operational constraints. Translation of the research questions into thematic domains, including: current shelter delivery strategies, field-level challenges, beneficiary experiences, supervision practices, perceived construction quality, homeowner satisfaction, roles of local authorities and coordination mechanisms, and lessons learned and recommendations. Formulation of open-ended questions to encourage descriptive and experience-based responses. External review with a shelter specialist and a member of the national shelter coordination mechanism to assess cultural and contextual appropriateness. A pilot interview with one participant to test clarity and sequencing, followed by minor refinements to wording and flow. 3. Sampling and Recruitment A purposive sampling strategy was used to recruit a diverse group of 20 stakeholders engaged in shelter programming and/or oversight. Participants represented multiple roles, including shelter coordinators (national and sub-national), technical/engineering specialists, project managers in international and local organisations, field engineers, local authority representatives, community leaders, and staff from United Nations programmes. Eligibility criteria included: At least two years of professional experience in shelter-related programmes. Direct involvement in shelter rehabilitation, technical supervision, coordination, or programme management. Geographic diversity across operational areas (Taiz, Marib, Al Hudaydah, and the West Coast). Recruitment was conducted via email, WhatsApp, and referrals through key informants (snowball sampling). No real names were recorded in the analytical dataset. Participants were assigned anonymised identifiers (P01–P20) to ensure confidentiality. 4. Data Collection Procedures Data collection was conducted during 2023–2024. A total of 20 interviews were completed. Thirteen interviews were conducted by phone or WhatsApp, and seven were conducted face-toface when access and security conditions allowed. Interview duration ranged from 35 to 75 minutes. Interviews were conducted in Arabic (Yemeni dialect). Prior to each interview, participants provided oral consent, which was documented. Interviews were audio-recorded and subsequently transcribed verbatim. Data collection took place in locations selected to maximise participant comfort and safety based on participant preference and

local constraints. The researcher also recorded observational notes on emphasis, hesitation, emotional tone, and salient non-verbal cues when applicable. 5. Transcription and Data Management All interviews were transcribed verbatim. Identifying information was removed during transcription, including names, organisational identifiers, and specific location markers. An internal coding system (P01–P20) was used consistently across all qualitative materials. Data were stored on a password-protected, encrypted device. Supporting analysis files were produced and maintained for auditability, including: a coding matrix, a codebook, a table of themes, and a curated quotes bank. 6. Data Analysis: Thematic Analysis (Six Phases) The analysis followed the six-phase approach to thematic analysis described by [1]. Phase 1: Familiarisation with the data Transcripts were read repeatedly to develop familiarity. Initial notes were recorded, and recurring patterns were identified. Phase 2: Generating initial codes Line-by-line coding was conducted using an inductive approach. More than 350 initial codes were generated and subsequently consolidated to reduce overlap and improve coherence. Phase 3: Searching for themes Codes were grouped into conceptually related clusters. Preliminary themes were developed by identifying patterns and relationships among coded segments. Phase 4: Reviewing themes Themes were reviewed through internal consistency checks and external review. Themes lacking sufficient evidentiary support were refined, merged, or removed. The aim was to ensure each theme was clearly supported by the data. Phase 5: Defining and naming themes Themes were defined with clear descriptions and boundaries, including identification of subthemes where relevant. Themes were assessed for distinctiveness, internal coherence, and analytic depth. Phase 6: Producing the report Representative quotes were selected to support interpretation. Findings were contextualised within Yemen’s shelter environment and linked to relevant literature. Supporting appendices were prepared to document analytic decisions and enhance transparency. 7. Trustworthiness Trustworthiness was addressed using the four criteria proposed by [2]. 7.1 Credibility Credibility was strengthened by including participants from diverse roles and institutional backgrounds to enable triangulation of perspectives. Findings were supported with direct quotes, and peer debriefing was conducted with two independent reviewers. Data saturation was assessed and deemed reached by the seventeenth interview, with subsequent interviews confirming rather than expanding the thematic structure. 7.2 Transferability Transferability was supported through detailed contextual description of the operational environments and the inclusion of practice-based examples from multiple settings.

7.3 Dependability Dependability was enhanced by maintaining a systematic audit trail documenting the interview guide, coding procedures, theme development and review, and key analytic decisions. 7.4 Confirmability Confirmability was supported by distinguishing participant perspectives from the researcher’s interpretations, grounding conclusions in verbatim quotes, and maintaining reflexive notes to monitor potential researcher influence. 8. Reflexivity Statement The researcher has professional experience in humanitarian work and contextual familiarity with Yemen. To mitigate potential bias, reflective notes were maintained throughout data collection and analysis. The researcher prioritised participant accounts, avoided imposing preconceptions on the data, and reviewed coding and thematic decisions with the supervisor and an independent colleague. 9. Ethical Considerations Oral informed consent was obtained and documented prior to interviews. Identifying and sensitive information was removed from transcripts. Procedures followed a do-no-harm approach to minimise potential risk to participants. Data were stored securely, identifiers were replaced with participant codes (P01–P20), and primary qualitative materials were not shared externally beyond the study team under the ethical constraints governing this research. 10. Outputs and Documentation The following materials were produced to support methodological transparency: Interview transcripts (P01–P20; anonymised). Coding matrix (spreadsheet format). Codebook (document/spreadsheet format). Table of themes (spreadsheet format). Quotes bank (spreadsheet format). Audit trail / methodological protocol (this document). Reflexive notes (maintained alongside the protocol).

**References**

[1] V. Braun and V. Clarke, “Using thematic analysis in psychology,” Qualitative Research in Psychology, vol. 3, no. 2, pp. 77–101, 2006, doi: 10.1191/1478088706qp063oa.

[2] Y. S. Lincoln and E. G. Guba, Naturalistic Inquiry. Beverly Hills, CA: Sage Publications, 1985.
